# Supplementary material
Source: PubMed Central journal article supplement (PMC8959093)
Supplement: NIHMS1781073-supplement-Supplementary_Data_S1.pdf [file NIHMS1781073-supplement-Supplementary_Data_S1.pdf]

1 **Supplementary File: Design features of provider- and patient-focused alerts**

2

3 **General Comments on Development and Implementation:**

4 Healthcare administrators from our partner institution (Eskenazi Health) contributed the  
5 boundaries within which we could develop and implement any intervention, and encouraged  
6 the use of decision support and videos to address knowledge and practice gaps identified in our  
7 preliminary work. The planned intervention was supported by administrators through periodic  
8 communication during the development and implementation planning phases, and their  
9 support for the objectives was shared in the introductory statements of the BPA itself as well as  
10 in provider meetings.

11

12 The provider-focused BPAs were constructed within the existing boundaries of the alerting  
13 mechanism established within the EPIC™ program. Multiple BPA's were generated to address  
14 multiple indications available for the target group of medications, as well as the messaging for  
15 new or prevalent use. Alerts were triggered when entering an order for a target medication  
16 (incident users) or when opening a patient's chart on the day of a visit (prevalent users).

17

18 Prior to implementation, a pilot phase was conducted at one intervention site for one month.  
19 Following this pilot, feedback from providers was invited to both confirm the alerts were  
20 triggered and revise the alert to improve efficiency and impact. Providers confirmed the  
21 presence of the alert but had no feedback to revise the performance of the alert.

22  
23  
24  
25  
26  
27  
28  
29  
30  
31  
32  
33  
34  
35  
36  
37  
38  
39  
40  
41  
42  
43  
44

**Supplementary Figure S1: Initial Best Practice Advisory notification**

The figure below represents an example of the window that is initially shown when a provider opens the record of a patient who is a target anticholinergic user on the day of a visit. The message identifies the presence of a medication and creates a social norm of medication safety adopted by the system, and raises awareness to the availability of an alternative. The goal of the alert is to direct the provider to the smart set. The design of the alert follows the standard Best Practice Alert model available within the Epic® medical record system.

**Supplementary Figure S2: Example Provider Order Set**

Upon selecting the “Accept” or “Open SmartSet” buttons from the initial alert, providers are directed to the window shown below in Figure 2. This window personalizes taper schedules to a safer alternative based on the original target anticholinergic, indication (not shown in this example as the class primarily treats a common symptom) and dose. Providers select the medication and dose currently used, and the SmartSet automatically populates order characteristics along with directions for a titration to safer alternative. The intent of the auto-populated orders was to reduce the cognitive workload required of providers in selecting and titrating to a safe alternative medication. The auto-populated order could be edited by providers as desired.

45 **Design features of the patient-focused videos and alerts to medical assistants**

46

47 **General Comments on Development and Implementation:**

48 Healthcare administrators from our partner institution (Eskenazi Health) contributed the  
49 boundaries within which we could develop and implement any intervention, and encouraged  
50 the use of decision support and videos to address knowledge and practice gaps identified in our  
51 preliminary work. The planned intervention was supported by administrators through periodic  
52 communication during the development and implementation planning phases.

53

54 Medical assistants were provided background education on the video content and purpose,  
55 though no script was provided for their introduction of the video to the intended patient. Like  
56 the provider-focused best practice alerts, the medical assistant alerts were piloted at one  
57 intervention site for one month prior to implementation. Following this pilot, feedback from  
58 medical assistants was invited to both confirm the alerts were triggered and revise the alert to  
59 improve efficiency and impact. Based on this feedback, revisions to the timing of the alerts  
60 were made to better align the alert with workflow.

61

62

63

64 **Alert description**

65 The alert shown in figure 1 of the main text was presented to medical assistants either by  
66 opening a flowsheet to enter vitals or opening the patient chart on the day of a visit for patients  
67 with an active order for a target anticholinergic medication during the study period. The alert

68 reminded medical staff of the importance of patient safety, vulnerability of older adults, and an  
69 indicator to play one of three videos offered to patients. Staff had the ability to indicate  
70 whether the video was given to the patient, not given, or to dismiss the alert.

71

72

### 73 **Supplementary Figure S3: Video Description**

74 The animated awareness videos were written and produced by the IU Brain Safety Lab working  
75 with a digital storyteller and a graphic animator. Each of three videos tells the story of an older  
76 adult (with variations in sex, race, and Hispanic origin) who learns about anticholinergic  
77 medications, then consults with a physician or pharmacist about their personal risk and safer  
78 alternatives. The videos, ranging in duration from 3.5-4.5 minutes, address multiple topics  
79 including symptoms treated by anticholinergic medications, potential risks of anticholinergic  
80 use, the availability of alternatives, and the importance of consulting with a clinician.

81 Upon the recommendation of our partner institution's leadership (Eskenazi Health), we  
82 translated the patient-focused videos into Spanish language to accommodate a large  
83 Hispanic/Spanish population cared for by the system. The alerts were also redesigned to display  
84 the language-stratified video based on language preferences stated in the EMR.

85
