# Supplementary material
Source: PubMed Central journal article supplement (PMC8959093)
Supplement: NIHMS1781073-supplement-Supplementary_Figure_S1.pdf [file NIHMS1781073-supplement-Supplementary_Figure_S1.pdf]

Supplementary Figure S1:

BestPractice Advisory - Test, Arrivalthree

**Brain Safety Medication Alert**

ⓘ To improve patient safety, our clinical practice is seeking to reduce the use of medications with anticholinergic side effects among our more vulnerable patients. Please consider an alternative medication as recommended in our practice approved SmartSet.

[Open SmartSet](#) [Do Not Open](#) [Brain Safety Alternative: For Urinary Antispasmodics](#) [Preview](#)

[✓ Accept](#) [Dismiss](#)
