# Supplementary material
Source: PubMed Central journal article supplement (PMC8959093)
Supplement: NIHMS1781073-supplement-Supplementary_Figure_S2.pdf [file NIHMS1781073-supplement-Supplementary_Figure_S2.pdf]

## Supplementary Figure S2:

### Brain Safety Alternative: For Urinary Antispasmodics

#### ▼ Oxybutynin 5 MG or Less Per Day

##### ▼ OXYBUTYNIN 5 MG OR LESS PER DAY CROSS TO MIRABEGRON

SmartText: REMINDER: PROVIDER WILL NEED TO DISCONTINUE OXYBUTYNIN IN MEDS & ORDERS SECTION, WHEN ORDERING THE ALTERNATIVE. SmartText summary.

Amb Order: mirabegron 25 mg tablet extended release 24 hr 25 mg, oral, Daily, Starting S

#### ▼ Oxybutynin 6-10MG per day

##### ▼ OXYBUTYNIN 6-10MG PER DAY CROSS TO MIRABEGRON

Amb Order: oxybutynin (DITROPAN) 5 mg tablet Disp-7 tablet, R-0, Normal, Take oxybutynin one tablet once daily for week one, Starting S

Amb Order: mirabegron 25 mg tablet extended release 24 hr Disp-30 tablet, R-0, Normal, Take mirabegron 25 MG one tablet once daily week one and ongoing, Starting S

Amb Order: mirabegron 25 mg tablet extended release 24 hr 25 mg, oral, Daily, Normal, Starting S+31

#### ▼ OXYBUTYNIN 15 MG OR GREATER PER DAY

##### ▼ OXYBUTYNIN 15 MG OR GREATER PER DAY CROSS TO MIRABEGRON

Amb Order: oxybutynin (DITROPAN) 5 mg tablet Disp-14 tablet, R-0, Normal, Take oxybutynin one tablet daily for week one, Starting S

Amb Order: mirabegron 25 mg tablet extended release 24 hr Disp-30 tablet, R-0, Normal, Take mirabegron 25 MG one tablet daily week 2 and ongoing, Starting S+8

Amb Order: mirabegron 25 mg tablet extended release 24 hr 25 mg, oral, Daily, Normal, Starting S+31

#### ▼ Trospium 20 MG OR LESS per day

##### ▼ TROSPIMUM 20 MG OR LESS PER DAY CROSS TO MIRABEGRON

Amb Order: mirabegron 25 mg tablet extended release 24 hr 25 mg, oral, Daily, Stop trospium, take mirabegron

#### ▼ Trospium 21-40 MG per day

##### ▼ TROSPIMUM 21-40 MG PER DAY CROSS TO MIRABEGRON

Amb Order: trospium (SANCTURA) 20 mg tablet Disp-7 tablet, R-0, Normal, Take trospium 20mg one tablet by mouth once daily for Week One, Starting S

Amb Order: mirabegron 25 mg tablet extended release 24 hr Disp-30 tablet, R-0, Normal, Also take mirabegron 25mg one tablet once daily Week One and ongoing, Starting S

Amb Order: mirabegron 25 mg tablet extended release 24 hr 25 mg, oral, Daily, Normal, Starting S+31

#### ▼ Trospium 60 MG or greater per day

##### ▼ TROSPIMUM 60 MG OR GREATER PER DAY CROSS TO MIRABEGRON

Amb Order: trospium 60 mg capsule, extended release 24hr Disp-4 capsule, R-0, Normal, Take trospium 60mg one tablet by mouth every other day for Week One, Starting S

Amb Order: mirabegron 25 mg tablet extended release 24 hr Disp-30 tablet, R-0, Normal, take mirabegron 25mg one tablet by mouth once daily Week One and Ongoing, Starting S

Amb Order: mirabegron 25 mg tablet extended release 24 hr 25 mg, oral, Daily, Normal, Starting S+31

#### ▼ SOLIFENACIN 5-10 MG PER DAY

##### ▼ SOLIFENACIN 5-10 MG CROSS TO MIRABEGRON

Amb Order: solifenacin (VESICARE) 5 mg tablet Disp-4 tablet, DAW, Normal, Take Solifenacin 5mg one tablet by mouth every other day for Week One, Starting S

Amb Order: mirabegron 25 mg tablet extended release 24 hr Disp-30 tablet, R-0, Normal, take mirabegron 25mg one tablet by mouth once daily Week One and ongoing, Starting S

Amb Order: mirabegron 25 mg tablet extended release 24 hr 25 mg, Normal, Starting S+31

#### ▼ DARIFENACIN 7.5MG

##### ▼ AMB DARIFENACIN 7.5MG CROSS TO MIRABEGRON

Amb Order: darifenacin (ENABLEX) 7.5 mg 24 hr tablet Disp-4 tablet, R-0, Normal, Take darifenacin (ENABLEX) by mouth every other day for Week 1, Starting S

Amb Order: mirabegron 25 mg tablet extended release 24 hr Disp-30 tablet, R-0, Normal, Take Mirabegron 25MG one tablet by mouth once daily Week 1 and ongoing, Starting S

Amb Order: mirabegron 25 mg tablet extended release 24 hr 25 mg, oral, Daily, Normal, Starting S+31

#### ▼ TOLTERODINE 2MG OR LESS PER DAY

##### ▼ AMB TOLTERODINE 2MG OR LESS PER DAY CROSS TO MIRABEGRON

SmartText: REMINDER: PROVIDER WILL NEED TO DISCONTINUE TOLTERODINE IN MEDS & ORDERS SECTION, WHEN ORDERING THE ALTERNATIVE. SmartText summary.

Amb Order: mirabegron 25 mg tablet extended release 24 hr 25 mg, oral, Daily, Normal

#### ▼ TOLTERODINE 4MG PER DAY

##### ▼ AMB TOLTERODINE 4MG PER DAY CROSS TO MIRABEGRON

Amb Order: tolterodine (DETROL) 2 mg tablet Disp-14 tablet, R-0, Starting S

Amb Order: mirabegron 25 mg tablet extended release 24 hr Disp-30 tablet, R-0, Normal, Take Mirabegron 25MG one tablet by mouth daily for Week 1 and ongoing, Starting S

Amb Order: mirabegron 25 mg tablet extended release 24 hr 25 mg, oral, Daily, Normal, Starting S+31

#### ▼ Tolterodine ER 2 MG per day

##### ▼ AMB TOLTERODINE ER 2MG PER DAY

Amb Order: tolterodine LA (DETROL LA) 2 mg 24 hr capsule Disp-4 capsule, R-0, Normal, Starting S

Amb Order: mirabegron 25 mg tablet extended release 24 hr Disp-30 tablet, R-0, Normal, Take mirabegron 25mg one tablet once daily, Week 1 and ongoing, Starting S

Amb Order: mirabegron 25 mg tablet extended release 24 hr 25 mg, oral, Daily, Normal, Starting S+31

#### ▼ TOLTERODINE ER 4MG PER DAY

##### ▼ AMB TOLTERODINE ER 4MG PER DAY CROSS TO MIRABEGRON

Amb Order: tolterodine LA (DETROL LA) 4 mg 24 hr capsule Disp-4 capsule, R-0, Normal, Starting S

Amb Order: mirabegron 25 mg tablet extended release 24 hr Disp-30 tablet, R-0, Normal, Take mirabegron 25mg one tablet once daily, Week 1 and ongoing, Starting S

Amb Order: mirabegron 25 mg tablet extended release 24 hr 25 mg, oral, Daily, Normal, Starting S+31
