# Supplementary material
Source: PubMed Central journal article supplement (PMC8959093)

**Supplementary Figure 3a:** Fred & Albert: Watch how Fred and Albert handle risks of medicines

URL: <https://vimeo.com/322102378/5a9d706c30>

Screenshot:

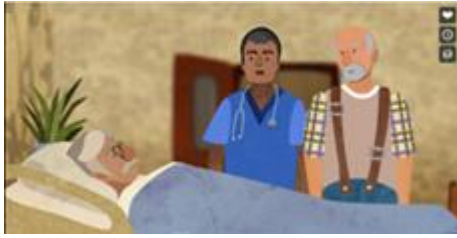

**Supplementary Figure 3b:** Rose & Emma: Watch how Rose decides to reduce her risks from medicines

URL: <https://vimeo.com/322104191/c3f5db297c>

Screenshot:

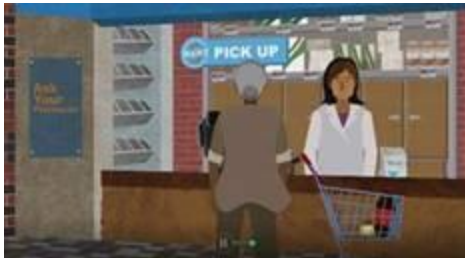

**Supplementary Figure 3c:** Roberto & Diane: Watch how Roberto talks to his pharmacist about making a change in his medicine

URL: <https://vimeo.com/322103778/0b73f2ebd4>

Screenshot:

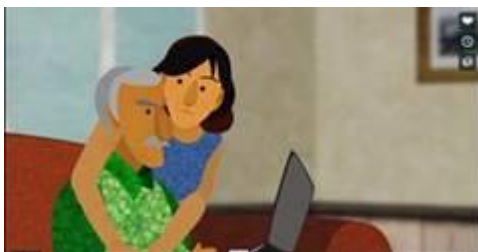

Supplement: NIHMS1781073-supplement-Supplementary_Figure_S3.pdf [file NIHMS1781073-supplement-Supplementary_Figure_S3.pdf]
